# Supplementary material
Source: PubMed Central journal article supplement (PMC9113726)
Supplement: mmc1.pdf [file mmc1.pdf]

# THE LANCET

## Supplementary appendix

This appendix formed part of the original submission and has been peer reviewed. We post it as supplied by the authors.

Supplement to: Kickbusch I, Liu A. Political Science and Health 3: Global health diplomacy—reconstructing power and governance. *Lancet* 2022; published online May 17. [https://doi.org/10.1016/S0140-6736\(22\)00583-9](https://doi.org/10.1016/S0140-6736(22)00583-9).

## Appendix: articles/books considered in the systematic review

| Title                                                                                                | Author(s)                                                                                                                                                                      | Type of article  | Journal                                                    | Main IR concepts/theories applied                          | Year |
|------------------------------------------------------------------------------------------------------|--------------------------------------------------------------------------------------------------------------------------------------------------------------------------------|------------------|------------------------------------------------------------|------------------------------------------------------------|------|
| <b>A disaster diplomacy perspective of acute public health events</b>                                | Whittaker, Charlie; Frühauf, Anna; Burthem, Samuel John; Parry, Rebecca Shoshanah; Kotikalapudi, Meghana; Liang, Yihui; Barker, Mary Moffett; Patel, Parth Rohit; Kelman, Ilan | Original article | Disasters                                                  | Disaster diplomacy                                         | 2018 |
| <b>African health diplomacy: obscuring power and leveraging dependency through shadow diplomacy</b>  | Anderson, Emma-Louise                                                                                                                                                          | Original article | International Relations                                    | Shadow diplomacy, formal diplomacy / non-Western IR theory | 2018 |
| <b>Asia's Participation in Global Health Diplomacy and Global Health Governance</b>                  | Fidler, David P.                                                                                                                                                               | Original article | Asian Journal of Wto & International Health Law and Policy | Sovereignty, multipolarity, great power                    | 2010 |
| <b>Brazil and the Framework Convention on Tobacco Control: Global Health Diplomacy as Soft Power</b> | Lee, Kelley; Chagas, Luiz Carlos; Novotny, Thomas E.                                                                                                                           | Original article | Plos Medicine                                              | Soft power                                                 | 2010 |
| <b>Brazilian Pharmaceutical Diplomacy: Social Democratic Principles Versus Soft Power Interests</b>  | Flynn, Matthew                                                                                                                                                                 | Original article | International Journal of Health Services                   | Constructivism and realism                                 | 2013 |
| <b>China's Health Diplomacy in Africa</b>                                                            | Youde, Jeremy                                                                                                                                                                  | Original article | China: An International Journal                            | Soft power, hard power                                     | 2010 |
| <b>China's Response to the 2014 Ebola Outbreak in West Africa</b>                                    | Huang, Yanzhong                                                                                                                                                                | Original article | Global Challenges                                          | Soft power                                                 | 2017 |

|                                                                                                                                     |                                                                           |                  |                                                                                |                                                     |      |
|-------------------------------------------------------------------------------------------------------------------------------------|---------------------------------------------------------------------------|------------------|--------------------------------------------------------------------------------|-----------------------------------------------------|------|
| <b>Cuban Medical Internationalism through a Feminist Perspective</b>                                                                | Pérez, José O; da Silva, André L Reis                                     | Original article | Contexto Internacional                                                         | Feminist IR theory                                  | 2019 |
| <b>Disease Diplomacy: International Norms and Global Health Security</b>                                                            | Davies, Sara E.; Kamradt-Scott, Adam; Rushton, Simon                      | Scholarly book   | N/A                                                                            | Norm life cycle framework / constructivism          | 2017 |
| <b>From biodefence to biosecurity: the Obama administration's strategy for countering biological threats</b>                        | Koblentz, Gregory D.                                                      | Original article | International Affairs                                                          | Smart power                                         | 2012 |
| <b>Global health and International Relations</b>                                                                                    | McInnes, Colin; Lee, Kelley                                               | Scholarly book   | N/A                                                                            | (Neo-)realism, (neo-)liberalism, constructivism     | 2012 |
| <b>Global health diplomacy, 'Smart Power', and the new world order</b>                                                              | Kevany, Sebastian                                                         | Original article | Global public health                                                           | Smart power, soft power, hard power                 | 2014 |
| <b>Global Health Governance in International Society</b>                                                                            | Youde, Jeremy                                                             | Original article | Global Governance: A Review of Multilateralism and International Organizations | International Society / English School IR theory    | 2017 |
| <b>Health as niche diplomacy: assessing design and practices of Brazilian health diplomacy at the beginning of the 21st century</b> | Gayard, Nicole                                                            | Original article | Revista Brasileira de Política Internacional                                   | Niche diplomacy                                     | 2019 |
| <b>Health for health's sake, winning for God's sake: US Global Health Diplomacy and smart power in Iraq and Afghanistan</b>         | McInnes, Colin; Rushton, Simon                                            | Original article | Review of International Studies                                                | Smart power, hard power, soft power                 | 2014 |
| <b>Is there a social justice variant of South-South health cooperation?: a scoping and critical literature review</b>               | Birn, Anne-Emanuelle; Muntaner, Carles; Afzal, Zabia; Aguilera, Mariajosé | Review article   | Global Health Action                                                           | Neo-Marxist IR theory, proletarian internationalism | 2019 |

|                                                                                                                   |                                                       |                  |                                       |                                                                                          |      |
|-------------------------------------------------------------------------------------------------------------------|-------------------------------------------------------|------------------|---------------------------------------|------------------------------------------------------------------------------------------|------|
| <b>Locating regional health policy: Institutions, politics, and practices</b>                                     | Riggiozzi, Pia; Yeates, Nicola                        | Original article | Global Social Policy                  | Regionalism                                                                              | 2015 |
| <b>Negotiated Health Diplomacy: A Case Study of the EU and Central Asia</b>                                       | Collins, Neil; Bekenova, Kristina; Kagarmanova, Ainur | Original article | Hague Journal of Diplomacy            | Soft power                                                                               | 2018 |
| <b>Policy processes sans frontières: interactions in transnational governance of global health</b>                | Jones, Catherine M; Clavier, Carole; Potvin, Louise   | Original article | Policy Sciences                       | Policy learning and networking processes (based on Real-Dato's public policy framework)  | 2020 |
| <b>Regional governance and legitimacy in South America: the meaning of UNASUR</b>                                 | Riggiozzi, Pia; Grugel, Jean                          | Original article | International Affairs                 | Regionalism                                                                              | 2015 |
| <b>Regionalism, activism, and rights: New opportunities for health diplomacy in South America</b>                 | Riggiozzi, Pia                                        | Original article | Review of International Studies       | Regionalism, constructivism                                                              | 2015 |
| <b>Regionalizing Health Security: Thailand's Leadership Ambitions in Mainland Southeast Asian Disease Control</b> | Wenham, Clare                                         | Original article | Contemporary Southeast Asia           | Regional hierarchy, regional power                                                       | 2018 |
| <b>SARS: Political Pathology of the First Post-Westphalian Pathogen</b>                                           | Fidler, David P.                                      | Original article | The Journal of Law, Medicine & Ethics | Sovereignty, anarchy, balance of power, great power                                      | 2003 |
| <b>The 2011 Pandemic Influenza Preparedness Framework: Global Health Secured or a Missed Opportunity?</b>         | Kamradt-Scott, Adam; Lee, Kelley                      | Original article | Political Studies                     | Functional and moral-political benefits, authority in global governance / constructivism | 2011 |
| <b>The evolution, etiology and eventualities of the global health security regime</b>                             | Hoffman, Steven J                                     | Original article | Health policy and planning            | International regime                                                                     | 2010 |

|                                                                                                                                                               |                                                                                 |                  |                                    |                                                                                                                                             |      |
|---------------------------------------------------------------------------------------------------------------------------------------------------------------|---------------------------------------------------------------------------------|------------------|------------------------------------|---------------------------------------------------------------------------------------------------------------------------------------------|------|
| <b>The Soft Power Currencies of US Navy Hospital Ship Missions</b>                                                                                            | Forster, Larissa                                                                | Original article | International Studies Perspectives | Soft power                                                                                                                                  | 2015 |
| <b>The World Health Organization between North and South</b>                                                                                                  | Chorev, Nitsan                                                                  | Scholarly book   | N/A                                | Constructivism, Principal-Agent theory                                                                                                      | 2012 |
| <b>Turning dread into capital: South Africa's AIDS diplomacy</b>                                                                                              | Fourie, Pieter                                                                  | Original article | Globalization and Health           | Niche diplomacy; hard power, soft power                                                                                                     | 2013 |
| <b>Understanding how domestic health policy is integrated into foreign policy in South Africa: a case for accelerating access to antiretroviral medicines</b> | Simon Moeketsi Modisenyane; Heinrich Hendricks, Stephen James; Fineberg, Harvey | Review article   | Global Health Action               | Transgovernmentalism (based on Walt and Gilson's policy analysis triangle and Kingdon's multiple streams model of the policymaking process) | 2017 |
| <b>WHO's next? Changing authority in global health governance after Ebola</b>                                                                                 | McInnes, Colin                                                                  | Original article | International Affairs              | Authority in global governance / constructivism                                                                                             | 2015 |
